# Supplementary material for: Enhanced energy barriers triggered by magnetic anisotropy modulation via tuning the functional groups on the bridging ligands in Dy2 single-molecule magnets
Source: Royal Society of Chemistry journal article supplement (doi:10.1039/c8dt03506g), 2018-01-01
Supplement: c8dt03506g1.pdf [file c8dt03506g1.pdf]

Supporting Information for

# Enhanced energy barriers triggered by magnetic anisotropy modulation via tuning the functional groups on the bridging ligands in Dy<sub>2</sub> single-molecule magnets

Yaru Qin,<sup>a</sup> Yu Jing,<sup>a</sup> Yu Ge,<sup>a</sup> Wei Liu,<sup>a</sup> Yahong Li,<sup>\*a</sup> and Yi-Quan Zhang<sup>\*b</sup>

<sup>a</sup>College of Chemistry, Chemical Engineering and Materials Science, Soochow University, Suzhou 215123, China

<sup>b</sup>Jiangsu Key Laboratory for NSLSCS, School of Physical Science and Technology, Nanjing Normal University, Nanjing 210023, China

E-mail: [liyahong@suda.edu.cn](mailto:liyahong@suda.edu.cn); [zhangyiquan@ninu.edu.cn](mailto:zhangyiquan@ninu.edu.cn)

## Supplementary Information Contents

|                                                                                                                       |    |
|-----------------------------------------------------------------------------------------------------------------------|----|
| 1. Scheme for synthesis of the ligands H <sub>2</sub> L <sub>1</sub> and H <sub>2</sub> L <sub>2</sub> .....          | 2  |
| 2. <sup>1</sup> H, <sup>13</sup> C NMR spectra of H <sub>2</sub> L <sub>1</sub> , H <sub>2</sub> L <sub>2</sub> ..... | 2  |
| 3. PXRD patterns of <b>1</b> and <b>2</b> .....                                                                       | 4  |
| 4. IR spectra of H <sub>2</sub> L <sub>1</sub> , H <sub>2</sub> L <sub>2</sub> , <b>1</b> and <b>2</b> .....          | 4  |
| 5. Selected bond lengths and angles for <b>1</b> and <b>2</b> .....                                                   | 5  |
| 6. Figure for molecular structure of <b>2</b> .....                                                                   | 6  |
| 7. Energy dispersive X- ray spectroscopy (EDS) for <b>1</b> and <b>2</b> .....                                        | 7  |
| 8. 2D supramolecular framework for <b>1</b> generated by hydrogen-bonding interactions.....                           | 8  |
| 9. Hydrogen-bonding parameters of <b>1</b> .....                                                                      | 8  |
| 10. 1D supramolecular chain of <b>2</b> generated by hydrogen-bonding interactions.....                               | 8  |
| 11. Hydrogen-bonding parameters of <b>2</b> .....                                                                     | 8  |
| 12. MS spectra of complexes <b>1</b> and <b>2</b> .....                                                               | 9  |
| 13. Plots of magnetizations ( <i>M</i> ) vs dc field ( <i>H</i> ) for <b>1</b> (a) and <b>2</b> (b) at 2 K.....       | 10 |
| 14. ln $\tau$ versus $T^{-1}$ plots for complexes <b>1</b> and <b>2</b> at high temperature.....                      | 10 |
| 15. Best fitted parameters for complexes <b>1</b> and <b>2</b> under 0 Oe dc field.....                               | 11 |
| 16. Computational details.....                                                                                        | 12 |

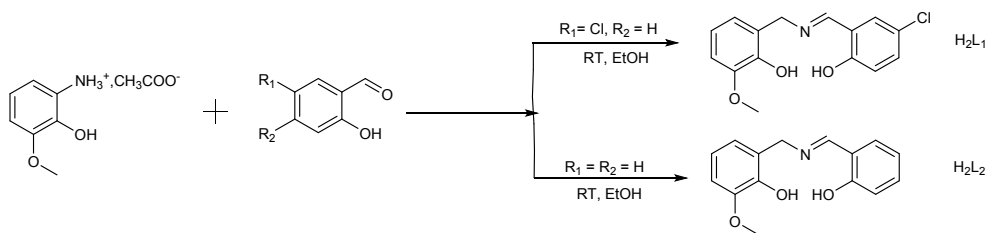

**Scheme S1** Synthesis of the ligands  $\text{H}_2\text{L}_1$  and  $\text{H}_2\text{L}_2$ .

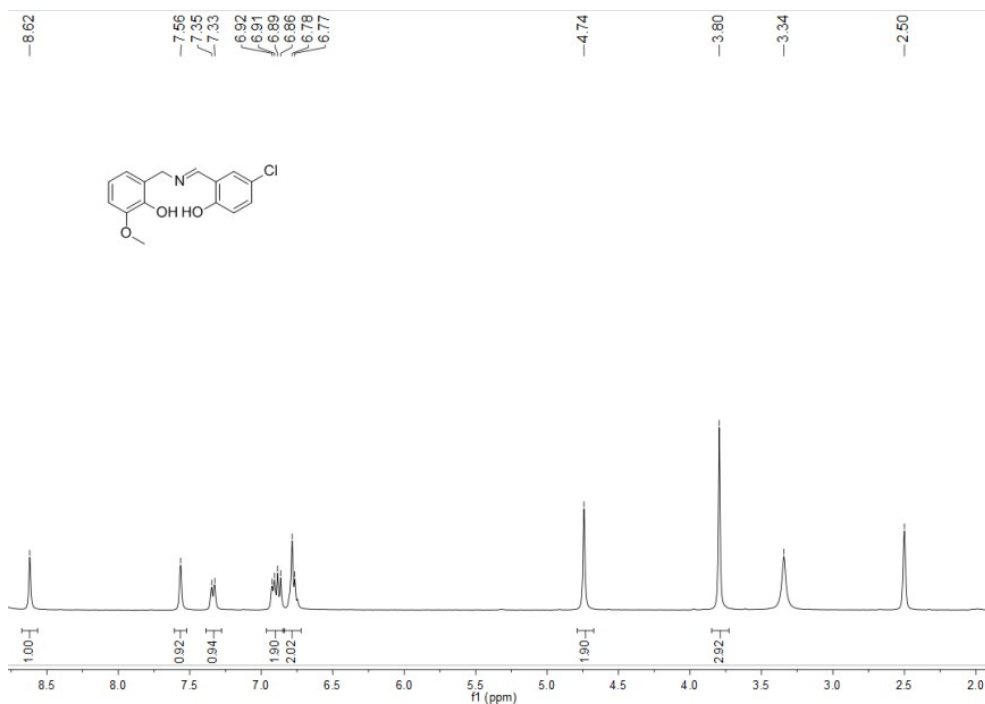

(a)

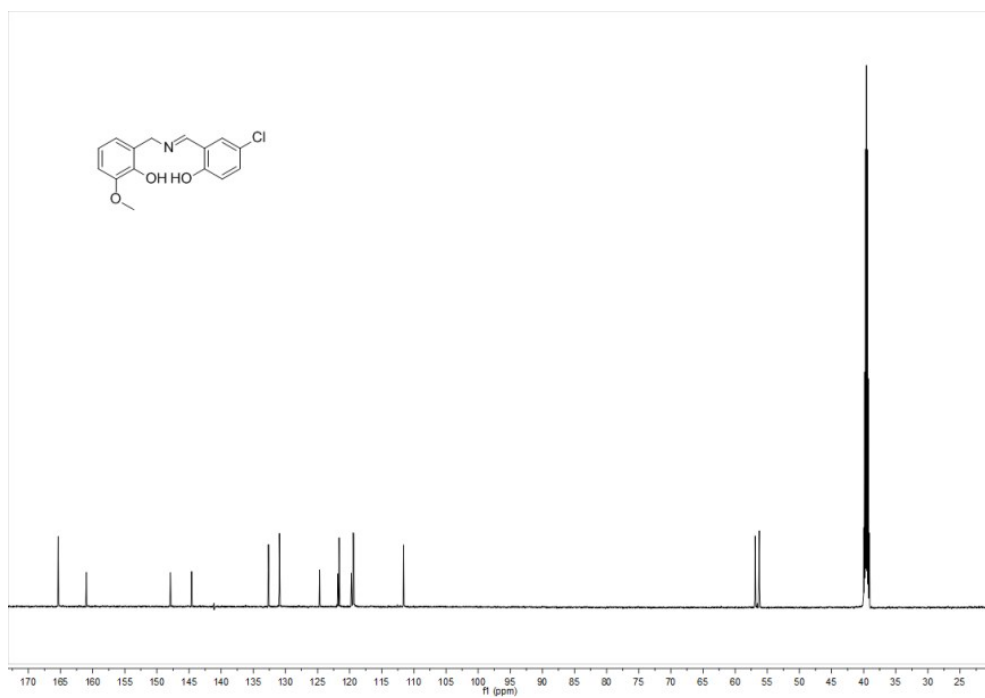

(b)

**Fig. S1** The  $^1\text{H}$  NMR (a) and  $^{13}\text{C}$  NMR (b) spectra of  $\text{H}_2\text{L}_1$ .

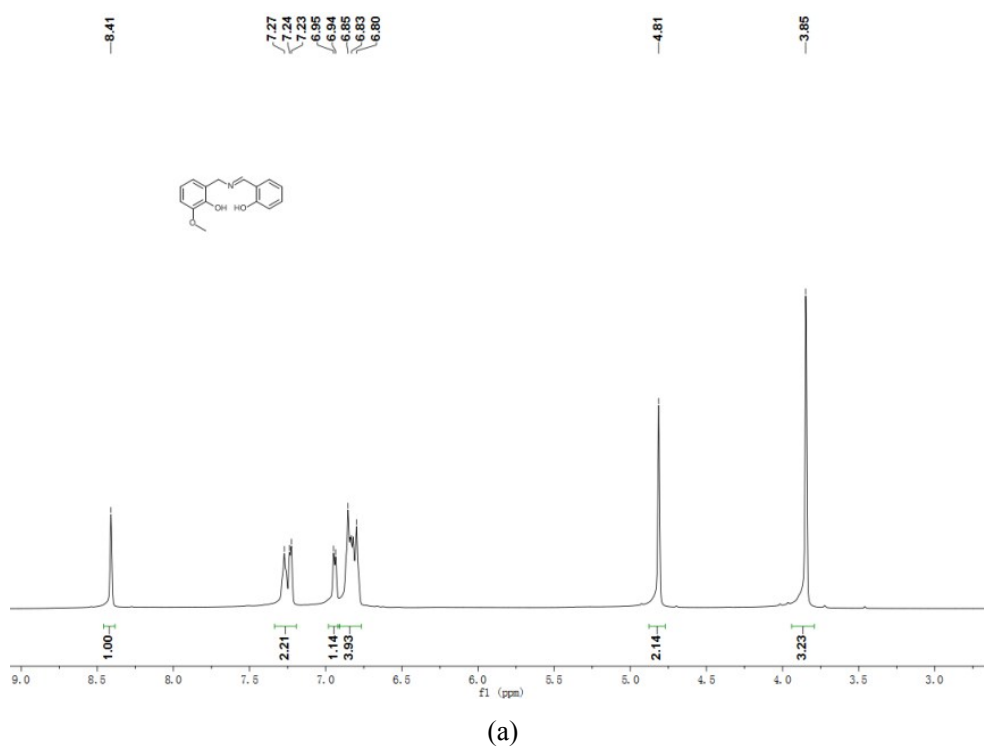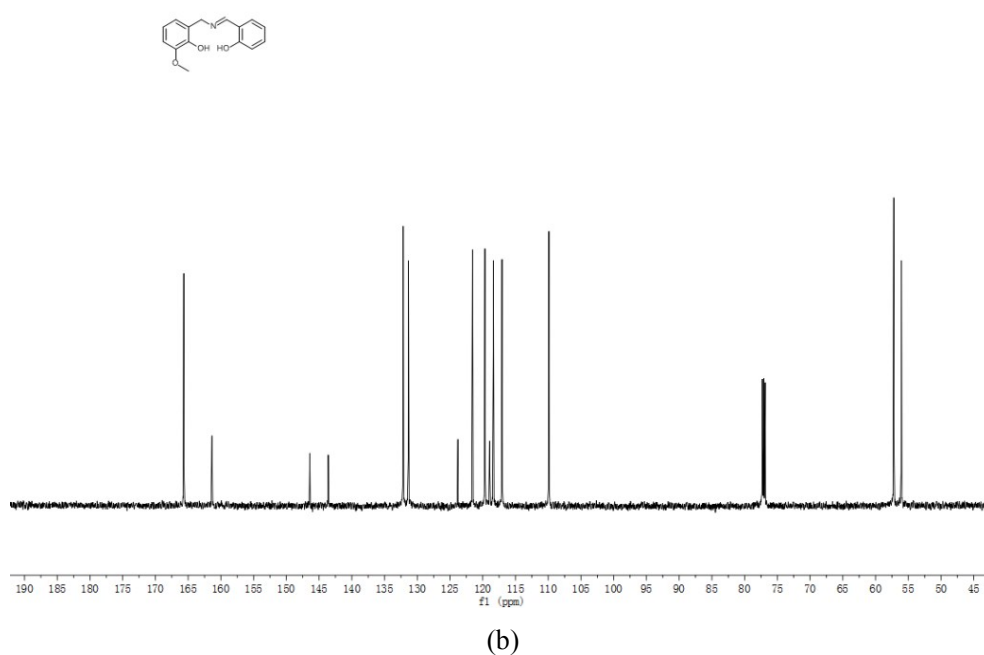

(b)  
**Fig. S2** The  $^1H$  NMR (a) and  $^{13}C$  NMR (b) spectra of  $H_2L_2$ .

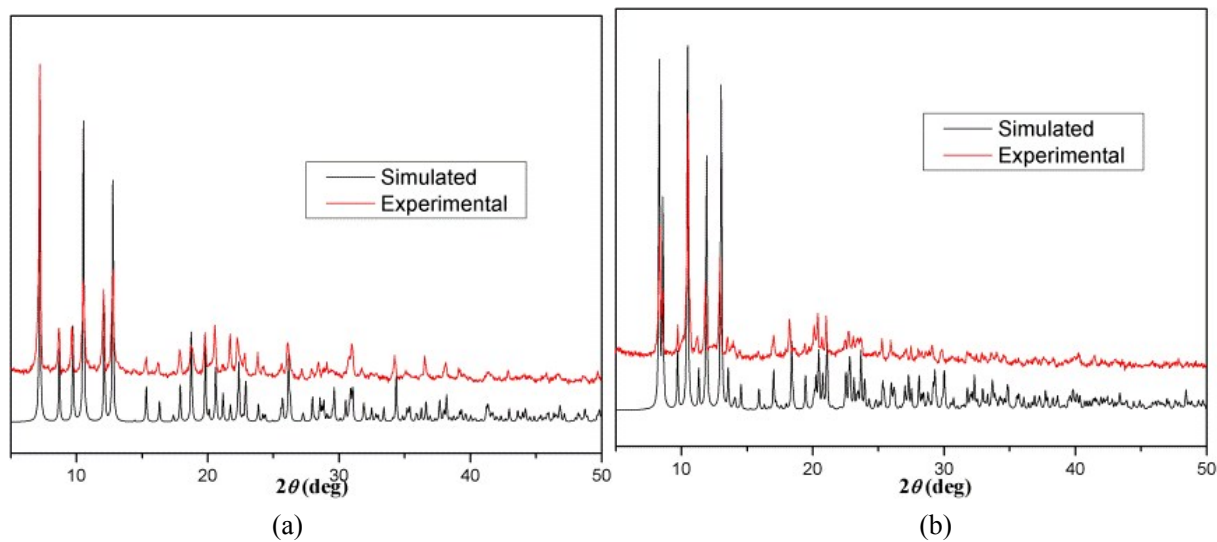

Fig. S3 PXR D patterns of **1** (a) and **2** (b).

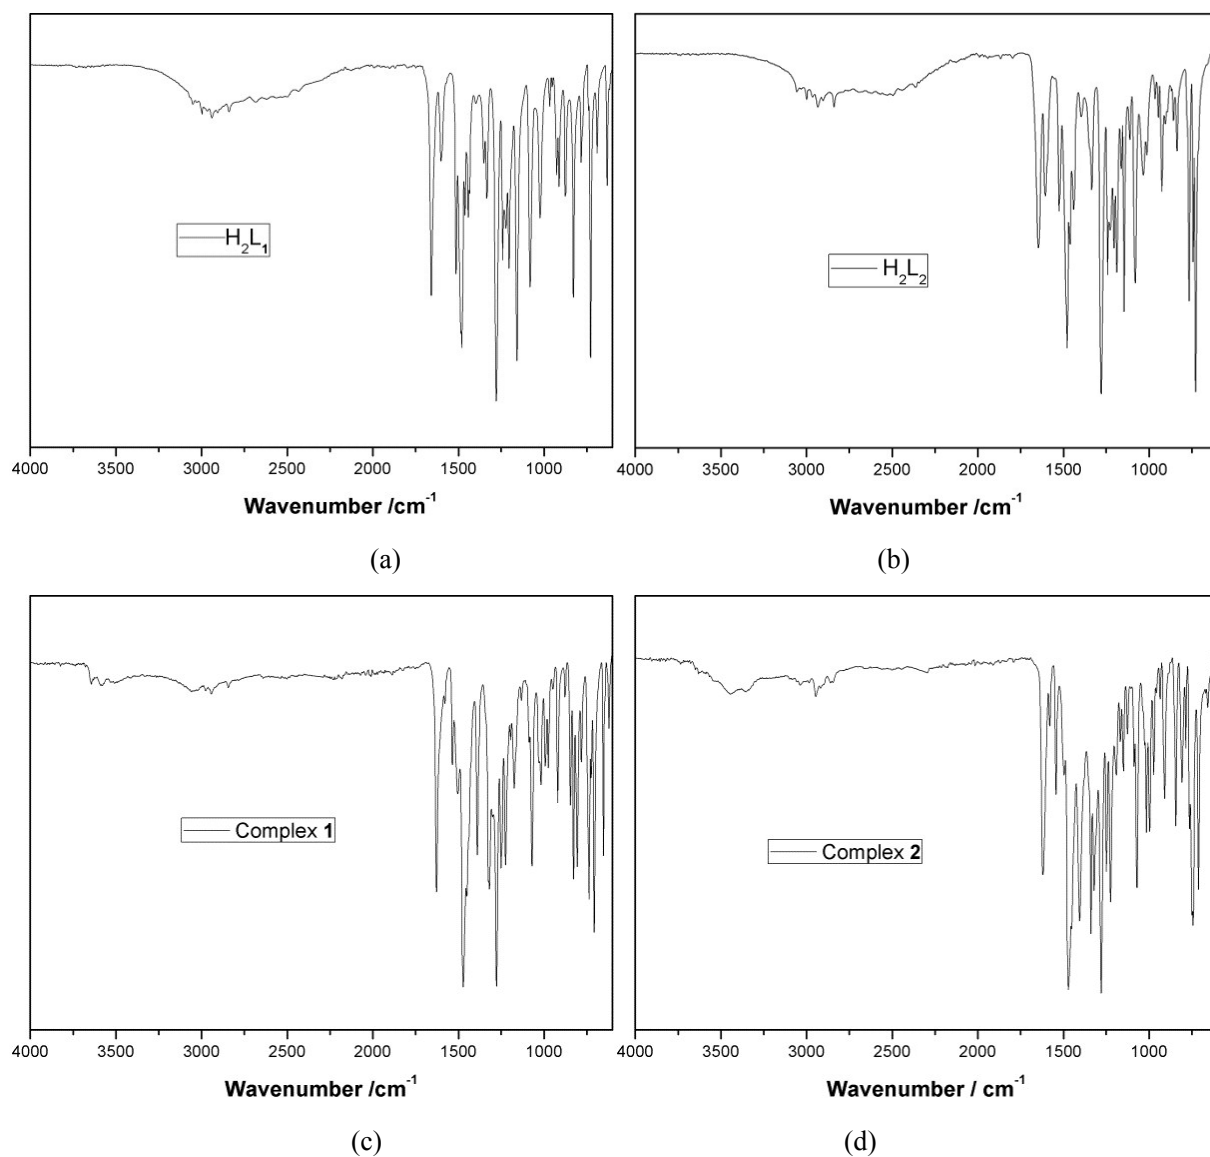

Fig. S4 FT-IR spectra of  $H_2L_1$  (a),  $H_2L_2$  (b), **1** (c) and **2** (d).

**Table S1.** Selected bond lengths (Å) and angle (°) for complexes **1** and **2**.

| <b>1</b>          |            |                  |            |
|-------------------|------------|------------------|------------|
| Dy(1)-O(1)A       | 2.332(3)   | Dy(1)-O(5)       | 2.436(4)   |
| Dy(1)-O(1)        | 2.376(3)   | Dy(1)-O(2)A      | 2.512(4)   |
| Dy(1)-O(3)        | 2.187(4)   | Dy(1)-O(7)       | 2.339(4)   |
| Dy(1)-O(4)        | 2.502(4)   | Dy(1)-N(1)       | 2.445(5)   |
| O(1)-Dy(1)-O(1)A  | 66.14(14)  | O(1)A-Dy(1)-O(4) | 119.24(13) |
| O(1)-Dy(1)-O(4)   | 76.33(13)  | O(1)A-Dy(1)-O(5) | 88.98(14)  |
| O(1)-Dy(1)-O(5)   | 99.73(15)  | O(1)-Dy(1)-O(2)A | 130.41(11) |
| O(1)A-Dy(1)-O(2)A | 65.31(12)  | O(1)A-Dy(1)-O(7) | 78.52(14)  |
| O(1)-Dy(1)-O(7)   | 105.08(16) | O(1)-Dy(1)-N(1)  | 77.49(13)  |
| O(1)A-Dy(1)-N(1)  | 128.67(14) | O(3)-Dy(1)-O(1)A | 146.34(13) |
| O(3)-Dy(1)-O(1)   | 147.51(12) | O(3)-Dy(1)-O(4)  | 82.16(15)  |
| O(3)-Dy(1)-O(5)   | 85.28(14)  | O(3)-Dy(1)-O(2)A | 81.62(13)  |
| O(3)-Dy(1)-O(7)   | 87.15(16)  | O(3)-Dy(1)-N(1)  | 76.02(14)  |
| O(4)-Dy(1)-O(2)A  | 120.50(14) | O(5)-Dy(1)-O(4)  | 51.81(14)  |
| O(5)-Dy(1)-O(2)A  | 70.05(15)  | O(5)-Dy(1)-N(1)  | 133.41(15) |
| O(7)-Dy(1)-O(4)   | 159.68(14) | O(7)-Dy(1)-O(5)  | 144.48(16) |
| O(7)-Dy(1)-O(2)A  | 74.52(16)  | O(7)-Dy(1)-N(1)  | 77.43(15)  |
| N(1)-Dy(1)-O(4)   | 83.22(14)  | N(1)-Dy(1)-O(2)A | 144.73(14) |
| <b>2</b>          |            |                  |            |
| Dy(1)-O(6)        | 2.438(5)   | Dy(1)-O(4)       | 2.461(5)   |
| Dy(1)-O(5)        | 2.465(5)   | Dy(1)-O(8)       | 2.419(5)   |
| Dy(1)-O(3)        | 2.165(5)   | Dy(1)-O(2)       | 2.336(5)   |
| Dy(1)-O(1)        | 2.318(5)   | Dy(1)-N(1)       | 2.467(6)   |
| Dy(2)-O(9)        | 2.155(5)   | Dy(2)-O(14)      | 2.381(5)   |
| Dy(2)-O(10)       | 2.464(5)   | Dy(2)-O(11)      | 2.534(5)   |
| Dy(2)-O(12)       | 2.462(5)   | Dy(2)-O(2)       | 2.304(5)   |
| Dy(2)-O(1)        | 2.337(5)   | Dy(2)-N(2)       | 2.446(6)   |
| O(6)-Dy(1)-O(5)   | 52.37(16)  | O(6)-Dy(1)-O(4)  | 130.38(17) |
| O(6)-Dy(1)-N(1)   | 75.91(18)  | O(5)-Dy(1)-N(1)  | 113.11(18) |
| O(3)-Dy(1)-O(6)   | 109.27(18) | O(3)-Dy(1)-O(5)  | 85.58(17)  |
| O(3)-Dy(1)-O(1)   | 145.28(17) | O(3)-Dy(1)-O(4)  | 80.79(17)  |
| O(3)-Dy(1)-O(8)   | 81.23(18)  | O(3)-Dy(1)-O(2)  | 143.71(16) |
| O(3)-Dy(1)-N(1)   | 73.59(19)  | O(1)-Dy(1)-O(6)  | 82.36(16)  |
| O(1)-Dy(1)-O(5)   | 124.51(16) | O(1)-Dy(1)-O(4)  | 117.20(17) |
| O(1)-Dy(1)-O(8)   | 75.52(16)  | O(1)-Dy(1)-O(2)  | 67.90(16)  |
| O(1)-Dy(1)-N(1)   | 78.14(18)  | O(4)-Dy(1)-O(5)  | 81.61(17)  |
| O(4)-Dy(1)-N(1)   | 148.88(18) | O(8)-Dy(1)-O(6)  | 151.91(17) |
| O(8)-Dy(1)-O(5)   | 155.61(17) | O(8)-Dy(1)-O(4)  | 76.11(18)  |
| O(8)-Dy(1)-N(1)   | 82.70(18)  | O(2)-Dy(1)-O(6)  | 84.06(17)  |
| O(2)-Dy(1)-O(5)   | 76.23(17)  | O(2)-Dy(1)-O(4)  | 65.81(16)  |
| O(2)-Dy(1)-O(8)   | 102.97(17) | O(2)-Dy(1)-N(1)  | 142.50(17) |
| O(9)-Dy(2)-O(10)  | 81.26(17)  | O(9)-Dy(2)-O(12) | 99.17(17)  |

|                   |            |                   |            |
|-------------------|------------|-------------------|------------|
| O(9)-Dy(2)-O(1)   | 140.65(16) | O(9)-Dy(2)-O(14)  | 85.76(18)  |
| O(9)-Dy(2)-O(11)  | 78.53(17)  | O(9)-Dy(2)-O(2)   | 150.97(17) |
| O(9)-Dy(2)-N(2)   | 74.12(18)  | O(10)-Dy(2)-O(11) | 75.72(16)  |
| O(12)-Dy(2)-O(10) | 125.14(16) | O(12)-Dy(2)-O(11) | 51.38(16)  |
| O(1)-Dy(2)-O(10)  | 65.75(15)  | O(1)-Dy(2)-O(12)  | 84.10(16)  |
| O(1)-Dy(2)-O(14)  | 104.09(17) | O(1)-Dy(2)-O(11)  | 73.21(16)  |
| O(1)-Dy(2)-N(2)   | 143.34(17) | O(14)-Dy(2)-O(10) | 74.17(16)  |
| O(14)-Dy(2)-O(12) | 160.48(17) | O(14)-Dy(2)-O(11) | 147.76(17) |
| O(14)-Dy(2)-N(2)  | 86.22(18)  | O(2)-Dy(2)-O(10)  | 119.33(16) |
| O(2)-Dy(2)-O(12)  | 85.59(17)  | O(2)-Dy(2)-O(1)   | 68.12(16)  |
| O(2)-Dy(2)-O(14)  | 81.29(18)  | O(2)-Dy(2)-O(11)  | 124.24(16) |
| O(2)-Dy(2)-N(2)   | 79.17(18)  | N(2)-Dy(2)-O(10)  | 149.53(17) |
| N(2)-Dy(2)-O(12)  | 77.14(18)  | N(2)-Dy(2)-O(11)  | 115.57(17) |

Symmetry transformations used to generate equivalent atoms: A: 1-X, 1-Y, +Z

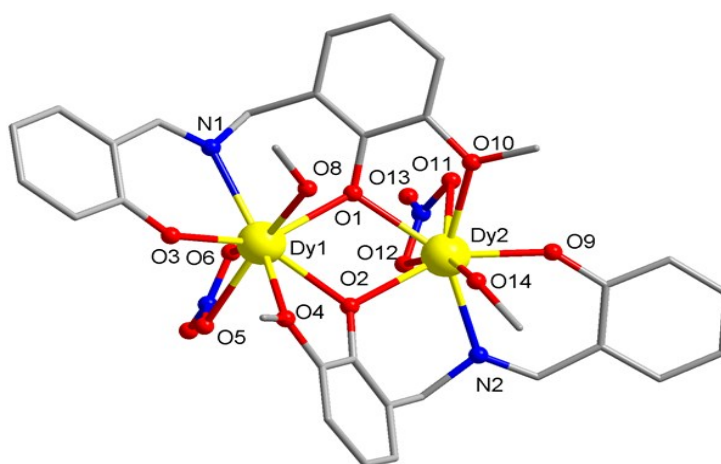

(a)

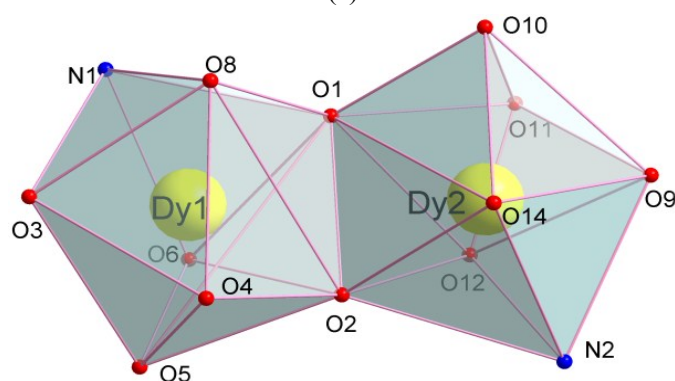

(b)

Fig. S5 (a) Molecular structure of  $\text{Dy}_2(\text{L}_2)_2(\text{NO}_3)_2(\text{MeOH})_2$  (**2**). Hydrogen atoms have been omitted for clarity. (b) Coordination polyhedra of  $\text{Dy}^{\text{III}}$  ions in **2**.

## Energy dispersive X- ray spectroscopy (EDS)

Energy dispersive X- ray spectroscopies (EDS) for complexes **1** and **2** are shown in Fig S6. Elements C, O, N, Dy and Cl were included in complex **1**, while elements C, O, N and Dy Cl were included in complex **2**. As Fig. S6 shown, the At% of Dy and Cl is 2:1.9 for **1**, and the At% of Dy and N is 1:2.06 for **2**. The results of EDS are matched with structures of complexes **1** and **2**.

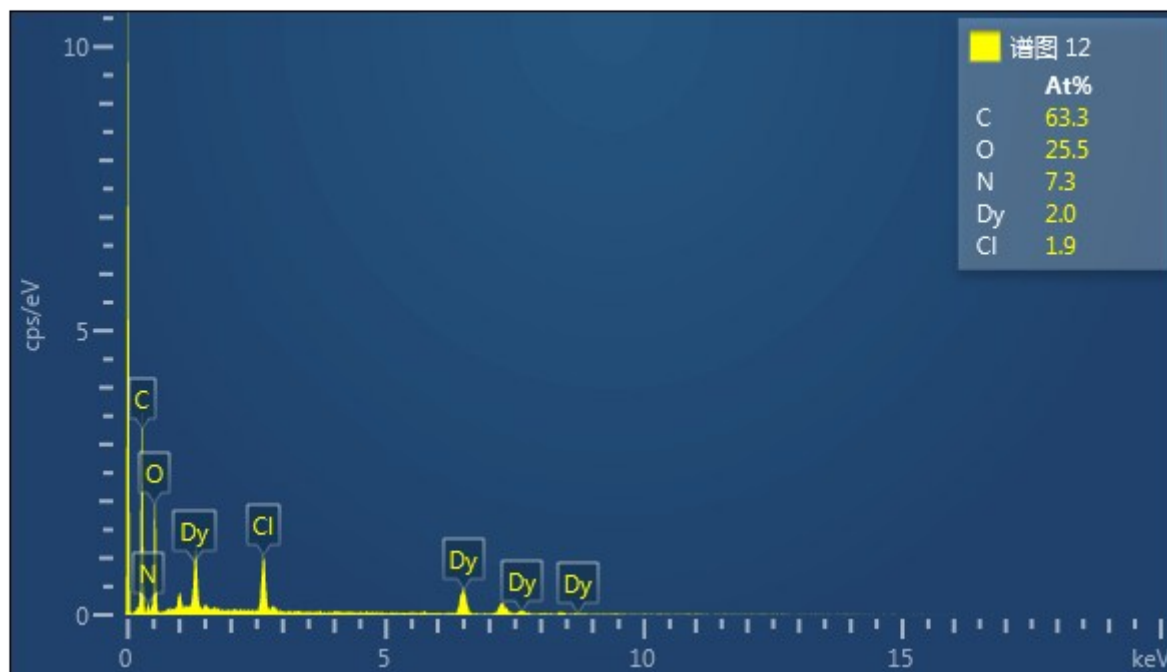

(a)

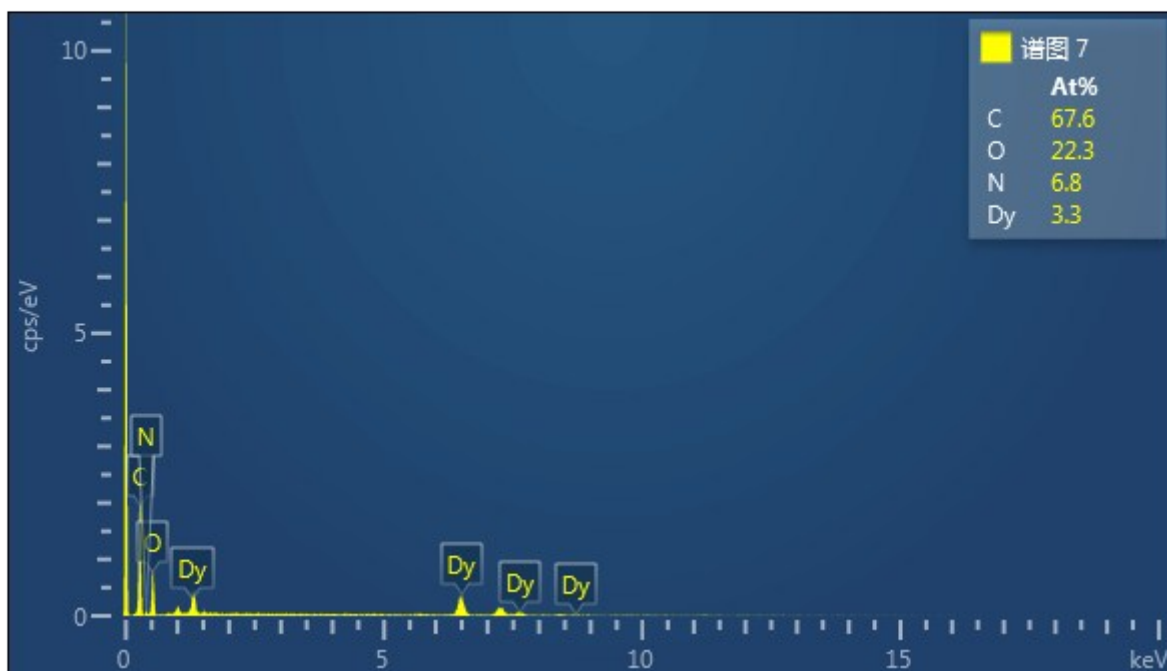

(b)

**Fig. S6** (a) Energy dispersive X- ray spectroscopy (EDS) for **1**; (b) Energy dispersive X- ray spectroscopy (EDS) for **2**.

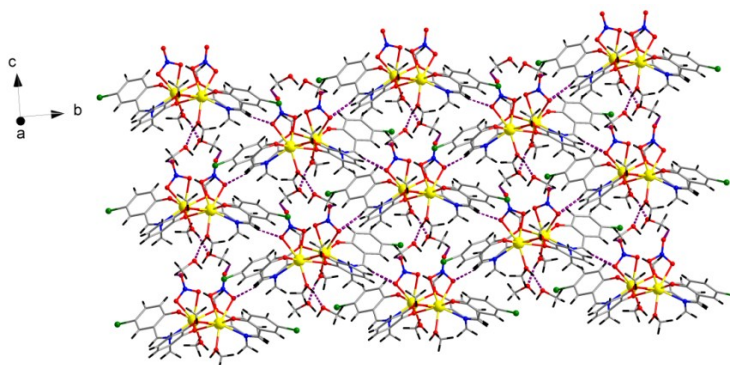

**Fig. S7.** 2D supramolecular framework of **1** generated by intermolecular hydrogen-bonding interactions.

**Table S2.** Hydrogen-bonding parameters (Å, deg) of **1**.

| D–H...A             | <i>d</i> (D–H) | <i>d</i> (H...A) | D...A     | ∠D–H...A |
|---------------------|----------------|------------------|-----------|----------|
| O(7)–H(7)...O(8)    | 0.87(5)        | 1.71(4)          | 2.553(8)  | 165(5)   |
| C(9)–H(9)...O(4)    | 0.94           | 2.51             | 3.390(7)  | 157      |
| C(17)–H(17A)...O(6) | 0.97           | 2.58             | 3.247(11) | 126      |

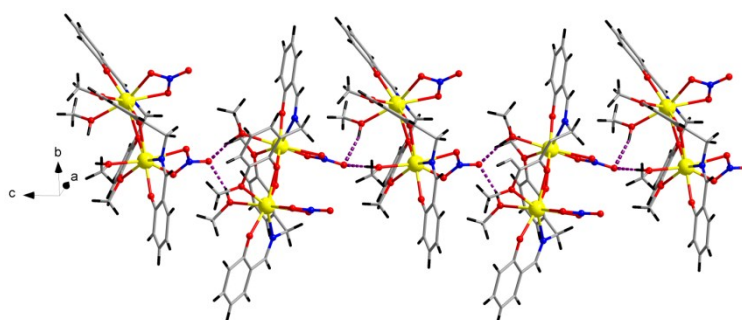

**Fig. S8** One-dimensional supramolecular chain of **2** generated by intermolecular hydrogen-bonding interactions.

**Table S3.** Hydrogen-bonding parameters (Å, deg) of **2**.

| D–H...A             | <i>d</i> (D–H) | <i>d</i> (H...A) | <i>d</i> (D...A) | ∠D–H...A |
|---------------------|----------------|------------------|------------------|----------|
| O(8)–H(8)...O(13)   | 0.88(2)        | 1.96(3)          | 2.810(8)         | 165(6)   |
| O(14)–H(14)...O(13) | 0.88(4)        | 1.91(5)          | 2.774(7)         | 169(4)   |



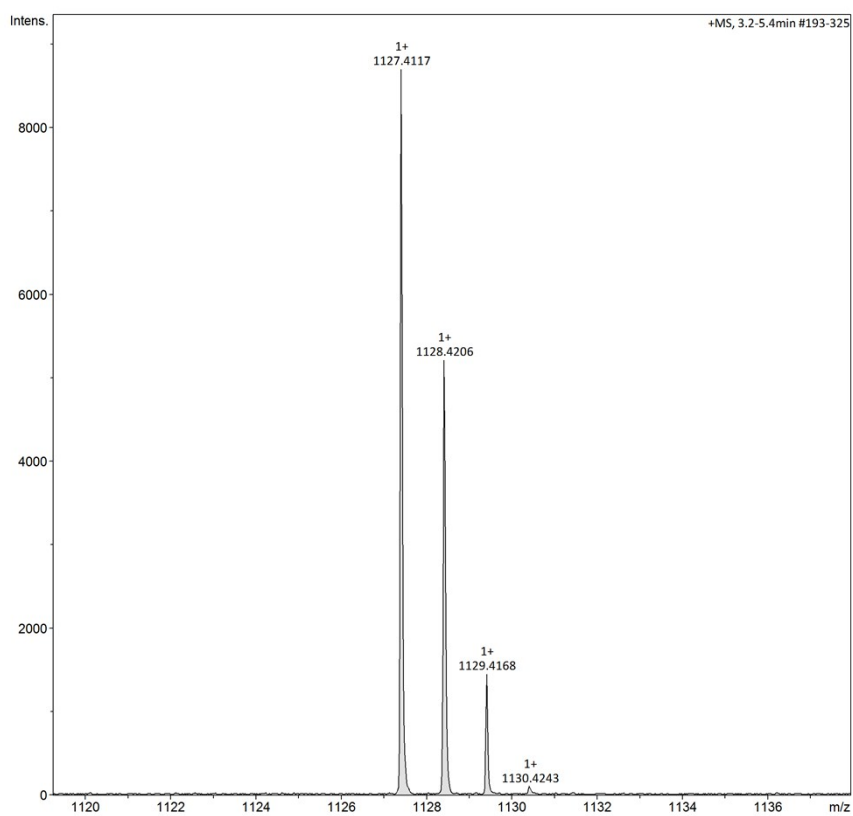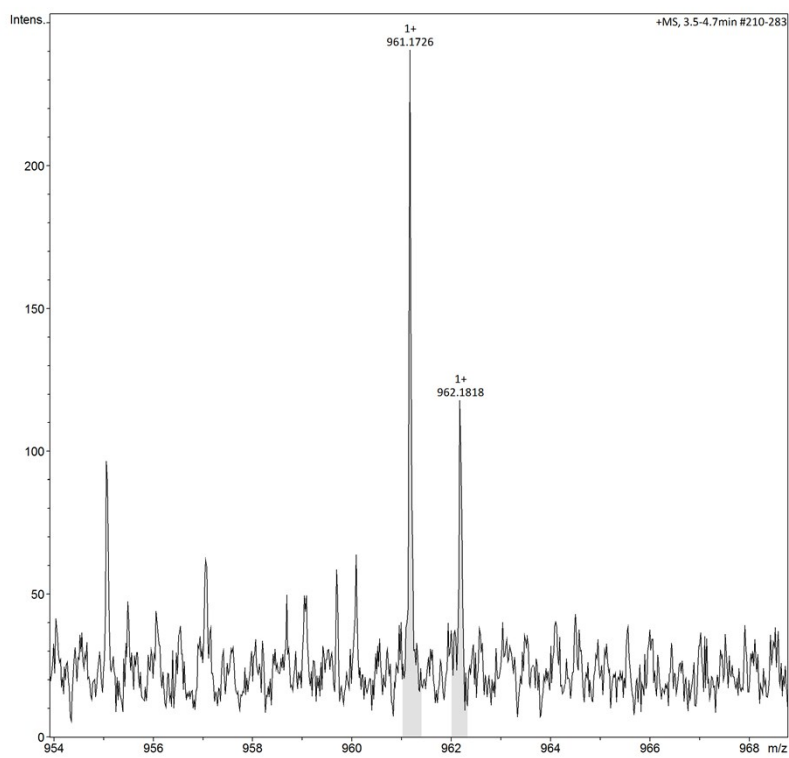

**Fig. S9** (a) MS spectrum of complex 1; (b) MS spectrum of complex 2.

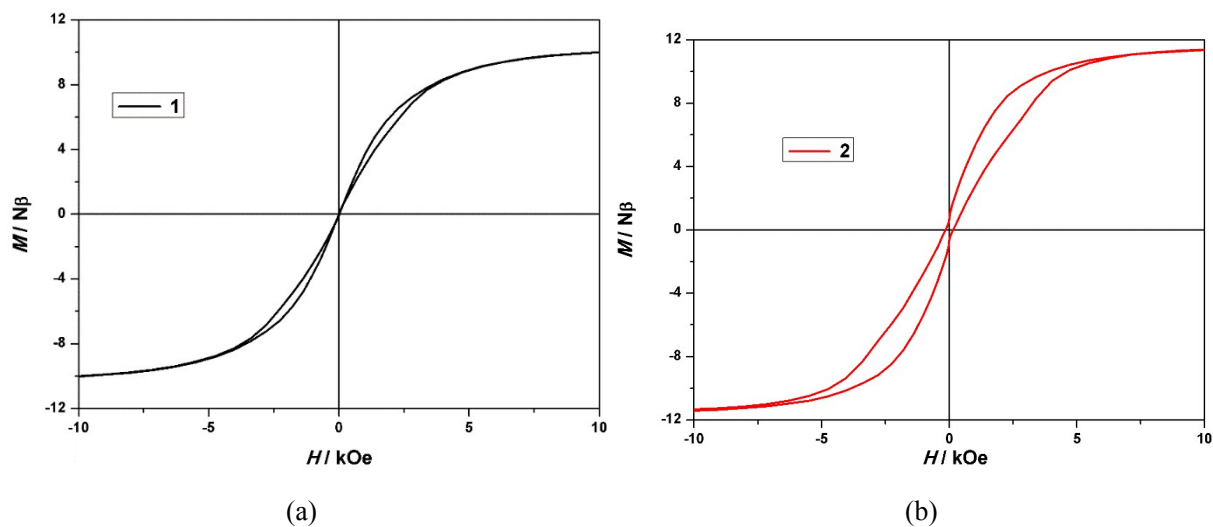

**Fig. S10** Plots of magnetizations ( $M$ ) vs dc field ( $H$ ) for **1** (a) and **2** (b) at 2 K.

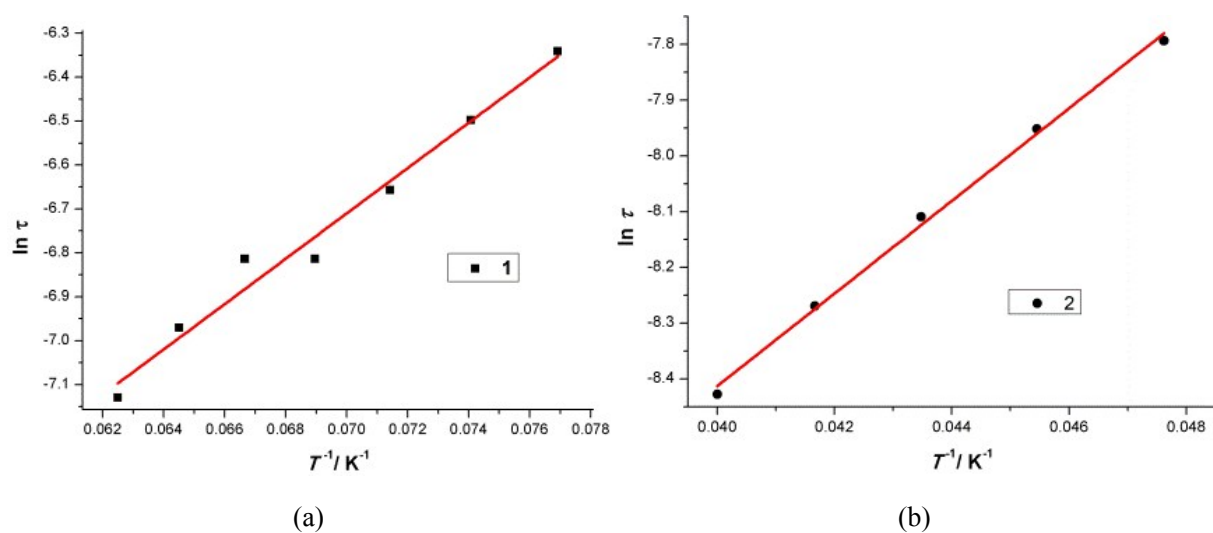

**Fig. S11**  $\ln \tau$  vs.  $T^{-1}$  plot for **1** (a) and **2** (b) at the high temperature; the solid lines represent the least-squares fits of the experimental data to the Arrhenius law.

**Table S4** Best fitted parameters with the extended Debye model for **1** under 0 Oe dc field in the temperature range 6-16 K.

| T/K  | $\chi_s$     | $\chi_T$     | $\tau$       | $\alpha$     |
|------|--------------|--------------|--------------|--------------|
| 6    | 0.381714E-01 | 0.496999E+01 | 0.166904E-01 | 0.129509E+00 |
| 6.5  | 0.276074E-01 | 0.456940E+01 | 0.117125E-01 | 0.129615E+00 |
| 7    | 0.160350E-01 | 0.424680E+01 | 0.851252E-02 | 0.132488E+00 |
| 7.5  | 0.650556E-03 | 0.398421E+01 | 0.634482E-02 | 0.140138E+00 |
| 8    | 0.970757E-03 | 0.372401E+01 | 0.480126E-02 | 0.139155E+00 |
| 8.5  | 0.151818E-02 | 0.350489E+01 | 0.371415E-02 | 0.139520E+00 |
| 9    | 0.982475E-09 | 0.330764E+01 | 0.292209E-02 | 0.141693E+00 |
| 9.5  | 0.148010E-08 | 0.312868E+01 | 0.232876E-02 | 0.141698E+00 |
| 10   | 0.228107E-08 | 0.296595E+01 | 0.188103E-02 | 0.141490E+00 |
| 10.5 | 0.314132E-08 | 0.281858E+01 | 0.153595E-02 | 0.141279E+00 |
| 11   | 0.436442E-08 | 0.268697E+01 | 0.126748E-02 | 0.141416E+00 |
| 11.5 | 0.571573E-08 | 0.256779E+01 | 0.105998E-02 | 0.141539E+00 |
| 12   | 0.558546E-08 | 0.246068E+01 | 0.892761E-03 | 0.141379E+00 |
| 12.5 | 0.743289E-08 | 0.236652E+01 | 0.758836E-03 | 0.141609E+00 |
| 13   | 0.115535E-07 | 0.227558E+01 | 0.649164E-03 | 0.141310E+00 |
| 13.5 | 0.163157E-07 | 0.219380E+01 | 0.558541E-03 | 0.141490E+00 |
| 14   | 0.264759E-07 | 0.211467E+01 | 0.483604E-03 | 0.141485E+00 |
| 14.5 | 0.415237E-07 | 0.204218E+01 | 0.421235E-03 | 0.141850E+00 |
| 15   | 0.658685E-07 | 0.197201E+01 | 0.368716E-03 | 0.142504E+00 |
| 15.5 | 0.101425E-06 | 0.190778E+01 | 0.325240E-03 | 0.144595E+00 |
| 16   | 0.155729E-06 | 0.184577E+01 | 0.286886E-03 | 0.145537E+00 |

**Table S5** Best fitted parameters with the extended Debye model for **2** under 0 Oe dc field in the temperature range 10-25 K.

| T/K | $\chi_s$     | $\chi_T$     | $\tau$       | $\alpha$     |
|-----|--------------|--------------|--------------|--------------|
| 10  | 0.212884E-01 | 0.292959E+01 | 0.162653E-01 | 0.118796E+00 |
| 11  | 0.147100E-01 | 0.269520E+01 | 0.103367E-01 | 0.123166E+00 |
| 12  | 0.591568E-02 | 0.250973E+01 | 0.678122E-02 | 0.127483E+00 |
| 13  | 0.262026E-14 | 0.232540E+01 | 0.462619E-02 | 0.135184E+00 |
| 14  | 0.367578E-14 | 0.217852E+01 | 0.326050E-02 | 0.139836E+00 |
| 15  | 0.540604E-14 | 0.207410E+01 | 0.236149E-02 | 0.146075E+00 |
| 16  | 0.892449E-14 | 0.194982E+01 | 0.176483E-02 | 0.149198E+00 |
| 17  | 0.140218E-13 | 0.184850E+01 | 0.132385E-02 | 0.149312E+00 |
| 18  | 0.245791E-13 | 0.175163E+01 | 0.100335E-02 | 0.146799E+00 |
| 19  | 0.409377E-13 | 0.165642E+01 | 0.773132E-03 | 0.142985E+00 |
| 20  | 0.454971E-13 | 0.157116E+01 | 0.602391E-03 | 0.137239E+00 |
| 21  | 0.675578E-13 | 0.150338E+01 | 0.472115E-03 | 0.129767E+00 |
| 22  | 0.101891E-12 | 0.142622E+01 | 0.379273E-03 | 0.125826E+00 |
| 23  | 0.157391E-12 | 0.135760E+01 | 0.304617E-03 | 0.118268E+00 |
| 24  | 0.234102E-12 | 0.130380E+01 | 0.247304E-03 | 0.111549E+00 |
| 25  | 0.346942E-12 | 0.125674E+01 | 0.202816E-03 | 0.107210E+00 |

## Computational details

Complete-active-space self-consistent field (CASSCF) calculations on lanthanide Dy<sup>III</sup> fragments of the model structures (see Fig. S11 for the model structures of **1\_a**, **1\_b**, **2\_a** and **2\_b**) extracted from the compounds on the basis of single-crystal X-ray determined geometries have been carried out with MOLCAS 8.0 program package (see Fig. S12 for the complete structures of complexes **1** and **2**).<sup>S1</sup> Each dysprosium center was calculated keeping the experimentally determined structure of the corresponding compound while replacing the neighboring Dy<sup>III</sup> ion by diamagnetic Lu<sup>III</sup>.

The basis sets for all atoms are atomic natural orbitals from the MOLCAS ANO-RCC library: ANO-RCC-VTZP for Dy<sup>III</sup> ion; VTZ for close O; VDZ for distant atoms. The calculations employed the second order Douglas-Kroll-Hess Hamiltonian, where scalar relativistic contractions were taken into account in the basis set and the spin-orbit couplings were handled separately in the restricted active space state interaction (RASSI-SO) procedure. For the fragment of individual Dy<sup>III</sup> ion, active electrons in 7 active spaces include all *f* electrons (CAS(9 in 7)) in the CASSCF calculation. To exclude all the doubts, we calculated all the roots in the active space. We have mixed the maximum number of spin-free state which was possible with our hardware (all from 21 sextets, 128 from 224 quadruplets, 130 from 490 doublets). Single\_Aniso<sup>S2</sup> program was used to obtain the *g* tensors, energy levels, magnetic axes, *et al.*, based on the above CASSCF/RASSI calculations.

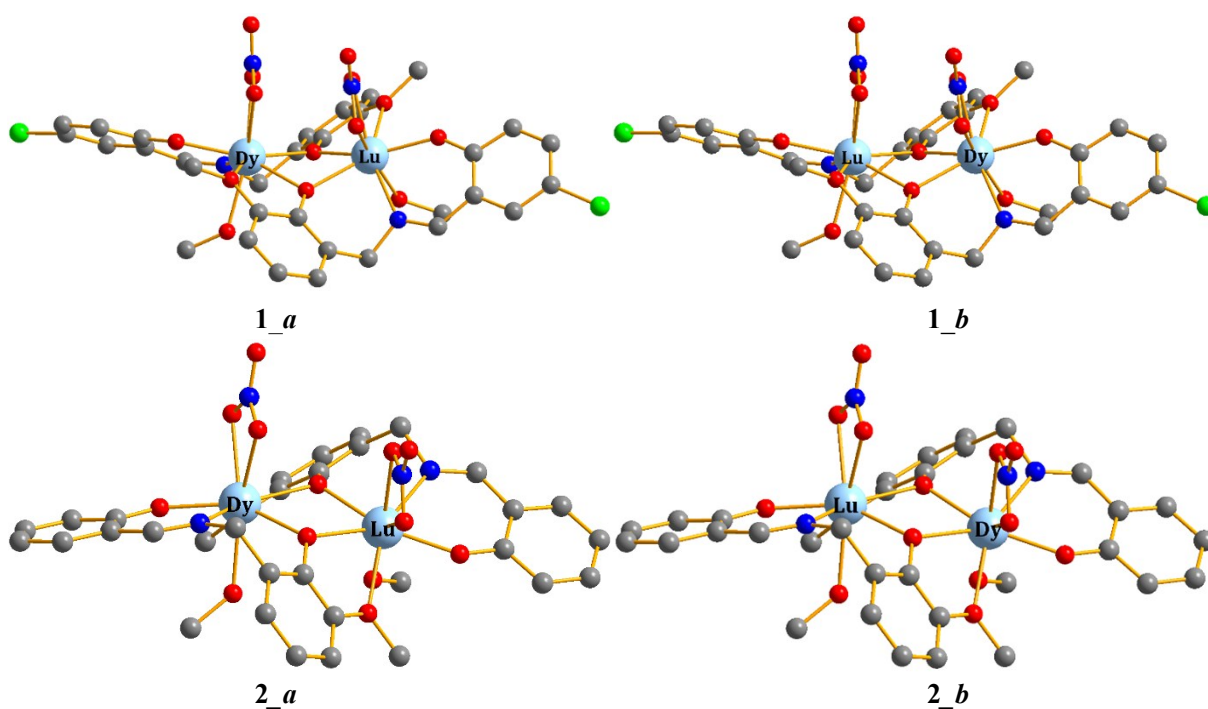

**Fig. S12** Calculated model structures of **1\_a**, **1\_b**, **2\_a** and **2\_b**; H atoms are omitted.

To fit the exchange interaction in the complex, we took two steps to obtain them. Firstly, we calculated each Dy<sup>III</sup> fragment using CASSCF to obtain the corresponding magnetic properties. Then, the exchange interaction between the magnetic centers is considered within the Lines model,<sup>S3</sup> while the account of the dipole-dipole magnetic coupling is treated exactly. The Lines model is effective and has been successfully used widely in the research field of f-element single-molecule magnets.<sup>S4</sup>

The exchange Ising Hamiltonian is:

$$\hat{H}_{exch} = -J_{total} \hat{S}_{Dy1} \hat{S}_{Dy2} \quad (S1)$$

The  $J_{total}$  is the parameter of the total magnetic interaction ( $J_{total} = J_{dipolar} + J_{exchange}$ ) between magnetic center ions.

The  $\hat{S}_{Dy} = \pm 1/2$  are the ground pseudospin on the Dy<sup>III</sup> sites. The dipolar magnetic coupling can be calculated exactly, while the exchange coupling constants were fitted through comparison of the computed and measured magnetic susceptibilities using the POLY\_ANISO program.<sup>S2</sup>

**Table S6** Calculated energy levels (cm<sup>-1</sup>), **g** ( $g_x, g_y, g_z$ ) tensors and  $m_J$  values of the lowest Kramers doublets (KDs) of individual Dy<sup>III</sup> fragments of **1\_a**, **1\_b**, **2\_a** and **2\_b**.

| KDs | <b>1_a</b>  |          |            | <b>1_b</b>  |          |            |
|-----|-------------|----------|------------|-------------|----------|------------|
|     | $E/cm^{-1}$ | <b>g</b> | $m_J$      | $E/cm^{-1}$ | <b>g</b> | $m_J$      |
| 1   | 0.0         | 0.002    | $\pm 15/2$ | 0.0         | 0.003    | $\pm 15/2$ |
|     |             | 0.004    |            |             | 0.005    |            |
|     |             | 19.686   |            |             | 19.723   |            |
| 2   | 234.0       | 0.059    | $\pm 13/2$ | 229.8       | 0.053    | $\pm 13/2$ |
|     |             | 0.075    |            |             | 0.070    |            |
|     |             | 16.860   |            |             | 16.935   |            |
| 3   | 383.9       | 1.254    | $\pm 11/2$ | 385.0       | 1.039    | $\pm 11/2$ |
|     |             | 1.438    |            |             | 1.223    |            |
|     |             | 13.075   |            |             | 13.223   |            |
| 4   | 460.1       | 4.838    | $\pm 7/2$  | 458.3       | 4.621    | $\pm 5/2$  |
|     |             | 5.922    |            |             | 5.942    |            |
|     |             | 10.123   |            |             | 10.960   |            |
| 5   | 508.5       | 0.253    | $\pm 1/2$  | 506.7       | 0.280    | $\pm 1/2$  |
|     |             | 2.718    |            |             | 2.283    |            |
|     |             | 13.487   |            |             | 13.775   |            |
| 6   | 569.6       | 0.837    | $\pm 5/2$  | 570.0       | 1.053    | $\pm 7/2$  |
|     |             | 1.906    |            |             | 1.997    |            |
|     |             | 14.344   |            |             | 14.511   |            |
| 7   | 599.3       | 0.968    | $\pm 3/2$  | 597.9       | 1.126    | $\pm 3/2$  |
|     |             | 2.343    |            |             | 2.463    |            |
|     |             | 15.957   |            |             | 15.696   |            |

|     |                    |                          |            |                    |                          |            |
|-----|--------------------|--------------------------|------------|--------------------|--------------------------|------------|
| 8   | 641.8              | 0.233<br>0.546<br>18.824 | $\pm 9/2$  | 636.9              | 0.286<br>0.775<br>18.698 | $\pm 9/2$  |
| KDs | <b>2_a</b>         |                          |            | <b>2_b</b>         |                          |            |
|     | $E/\text{cm}^{-1}$ | $g$                      | $m_J$      | $E/\text{cm}^{-1}$ | $g$                      | $m_J$      |
| 1   | 0.0                | 0.001<br>0.003<br>19.696 | $\pm 15/2$ | 0.0                | 0.003<br>0.004<br>19.732 | $\pm 15/2$ |
| 2   | 229.8              | 0.023<br>0.023<br>16.857 | $\pm 13/2$ | 267.2              | 0.086<br>0.119<br>16.644 | $\pm 13/2$ |
| 3   | 400.4              | 0.268<br>0.363<br>13.778 | $\pm 11/2$ | 454.0              | 0.723<br>0.874<br>13.480 | $\pm 11/2$ |
| 4   | 511.2              | 4.486<br>5.475<br>9.195  | $\pm 9/2$  | 582.5              | 3.967<br>4.898<br>9.254  | $\pm 9/2$  |
| 5   | 584.8              | 0.929<br>4.882<br>10.066 | $\pm 5/2$  | 672.6              | 3.356<br>3.918<br>11.647 | $\pm 5/2$  |
| 6   | 627.6              | 1.562<br>2.379<br>16.058 | $\pm 1/2$  | 752.3              | 10.097<br>8.141<br>0.100 | $\pm 1/2$  |
| 7   | 662.6              | 0.170<br>0.568<br>17.680 | $\pm 3/2$  | 766.1              | 11.446<br>6.750<br>0.529 | $\pm 3/2$  |
| 8   | 772.1              | 0.016<br>0.022<br>19.608 | $\pm 7/2$  | 832.5              | 0.072<br>0.157<br>19.355 | $\pm 7/2$  |

**Table S7** Exchange energies ( $\text{cm}^{-1}$ ) and main values of the  $g_z$  for the lowest two exchange doublets of **1** and **2**.

|   | <b>1</b>           |        | <b>2</b>           |        |
|---|--------------------|--------|--------------------|--------|
|   | $E/\text{cm}^{-1}$ | $g_z$  | $E/\text{cm}^{-1}$ | $g_z$  |
| 1 | 0.0                | 38.333 | 0.0                | 39.138 |
| 2 | 3.0                | 9.143  | 2.6                | 4.771  |

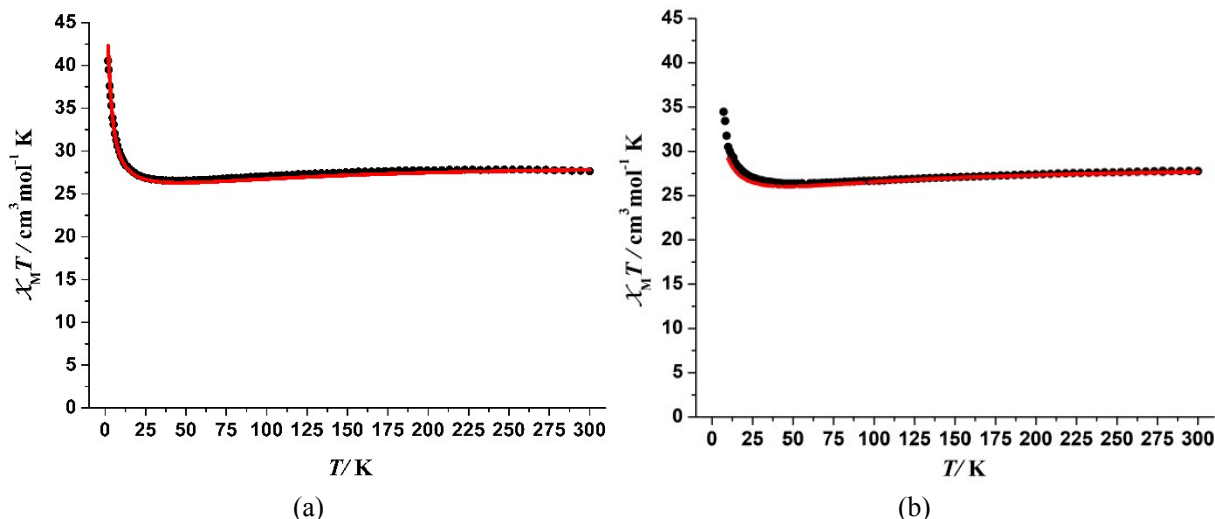

**Fig. S13** Calculated (red solid line) and experimental (circle dot) data of magnetic susceptibilities of complexes **1**(a) and **2**(b). The intermolecular interactions  $zJ'$  of **1** and **2** were fitted to 0.00 and  $-0.02 \text{ cm}^{-1}$ , respectively.

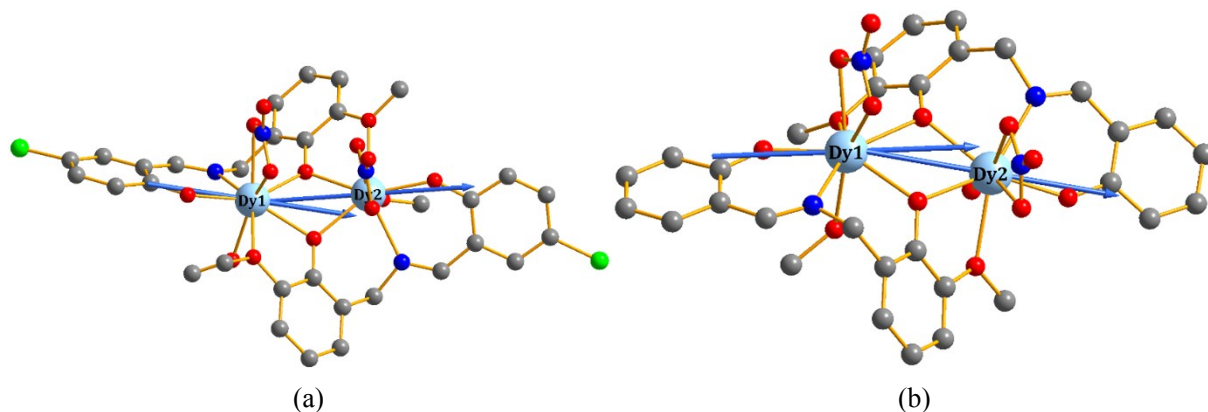

**Fig. S14** Calculated orientations of the local main magnetic axes of the ground Kramers doublet on Dy<sup>III</sup> ions of complexes **1** (a) and **2** (b).

**Table S8.** Included angle ( $\theta$ ) between the local main magnetic axis of the ground Kramers doublet on Dy<sub>1</sub> ( $\theta_1$ ) or Dy<sub>2</sub> ( $\theta_2$ ) and the vector connecting the two Dy<sup>III</sup> ions for complexes **1** and **2**.

|            | <b>1</b> | <b>2</b> |
|------------|----------|----------|
| $\theta_1$ | 14.47°   | 11.08°   |
| $\theta_2$ | 14.84°   | 4.34°    |

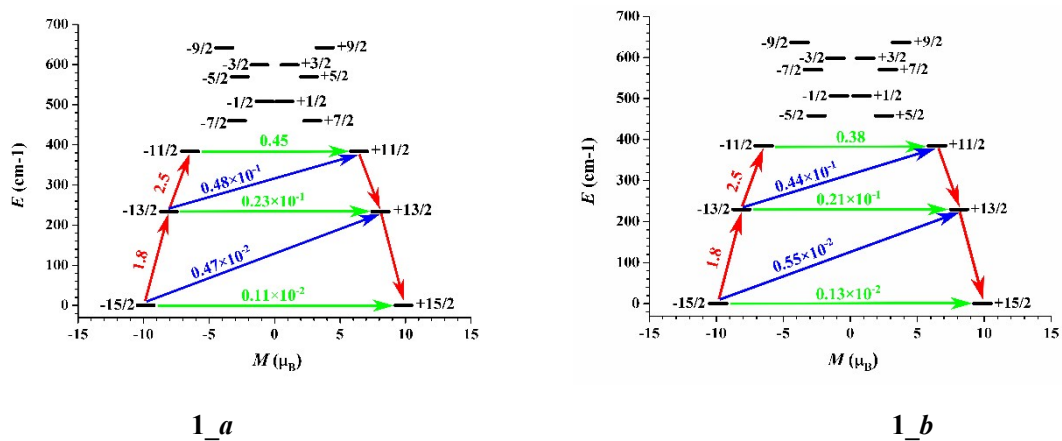

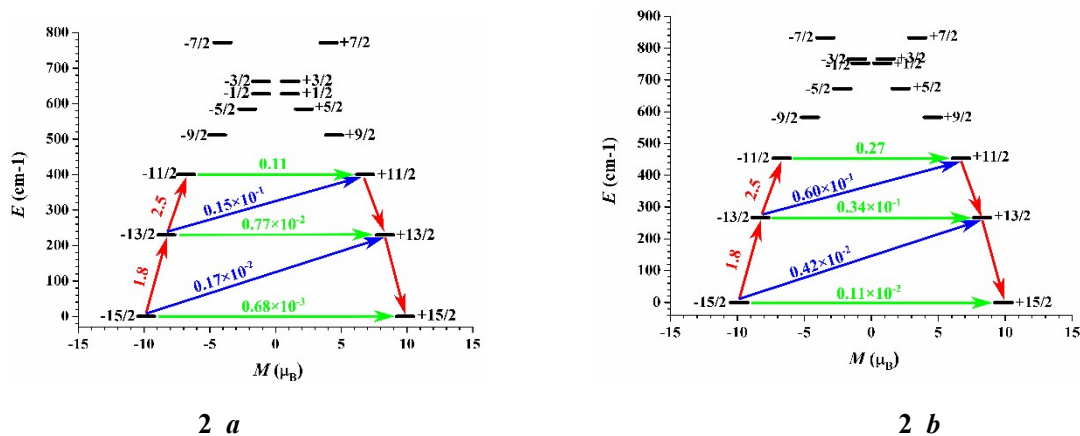

**Fig. S15** The magnetization blocking barriers in **1\_a**, **1\_b**, **2\_a** and **2\_b**. The thick black lines represent the Kramers doublets as a function of their magnetic moment along the magnetic axis. The green lines correspond to diagonal quantum tunneling of magnetization (QTM); the blue line represent off-diagonal relaxation process. The numbers at each arrow stand for the mean absolute value of the corresponding matrix element of transition magnetic moment.

### References:

- S1 (a) Aquilante, F.; De Vico, L.; Ferré, N.; Ghigo, G.; Malmqvist, P.-Å.; Neogrady, P.; Pedersen, T. B.; Pitonak, M.; Reiher, M.; Roos, B. O.; Serrano-Andrés, L.; Urban, M.; Veryazov, V.; Lindh, R. *J. Comput. Chem.*, **2010**, *31*, 224. (b) Veryazov, V.; Widmark, P. -O.; Serrano-Andres, L.; Lindh, R.; Roos, B. O. *Int. J. Quantum Chem.*, **2004**, *100*, 626. (c) Karlström, G.; Lindh, R.; Malmqvist, P. -Å.; Roos, B. O.; Ryde, U.; Veryazov, V.; Widmark, P. -O.; Cossi, M.; Schimmelpfennig, B.; Neogrady, P.; Seijo, L. *Comput. Mater. Sci.*, **2003**, *28*, 222.
- S2 (a) Chibotaru, L. F.; Ungur, L.; Soncini, A. *Angew. Chem. Int. Ed.*, **2008**, *47*, 4126. (b) Ungur, L.; Van den Heuvel, W.; Chibotaru, L. F. *New J. Chem.*, **2009**, *33*, 1224. (c) Chibotaru, L. F.; Ungur, L.; Aronica, C.; Elmoll, H.; Pilet, G.; Luneau, D. *J. Am. Chem. Soc.*, **2008**, *130*, 12445.
- S3 Lines, M. E. *J. Chem. Phys.* **1971**, *55*, 2977.
- S4 (a) Mondal, K. C.; Sundt, A.; Lan, Y. H.; Kostakis, G. E.; Waldmann, O.; Ungur, L.; Chibotaru, L. F.; Anson, C. E.; Powell, A. K. *Angew. Chem. Int. Ed.* **2012**, *51*, 7550. (b) Langley, S. K.; Wielechowski, D. P.; Vieru, V.; Chilton, N. F.; Moubaraki, B.; Abrahams, B. F.; Chibotaru, L. F.; Murray, K. S. *Angew. Chem. Int. Ed.* **2013**,
